# Supplementary material
Source: Elsevier journal article supplement (https://www.sciencedirect.com/science/article/pii/S1575181318302419)
Supplement: mmc1 [file S1575181318302419:mmc1.pdf]

## MATERIAL SUPLEMENTARIO - ANEXOS

### ANEXO I

#### - FACULTAD DE MEDICINA: UNIVERSIDADE DO PORTO (PORTUGAL)

La Facultad de Medicina de la Universidad de Porto (FMUP) creada en 1911, ocupa un lugar muy destacado en la producción científica nacional, sus docentes e investigadores desarrollan proyectos de investigación, tanto de ámbito internacional como nacional. La FMUP ofrece un **doctorado en Salud Pública**. La investigación así como los cursos que componen el programa doctoral se realizan en el Instituto de Salud Pública de la UP, y en particular en la Unidad de Investigación evaluada y financiada por la Fundación para la Ciencia y la Tecnología (FCT). Esta estructura de investigación y entrenamiento en salud pública fue creada en 2006 en la Universidad de Porto para responder a la naturaleza multidisciplinar de la investigación y del trabajo en salud pública. Hoy en día es una de las instituciones de investigación sanitaria más productivas de Portugal. EL instituto reúne tres cohortes poblacionales: 1) EPIPorto, un estudio prospectivo de 2485 adultos de Oporto con dos décadas de seguimiento. 2) EPITeen, una cohorte de 2160 individuos nacidos en 1990, reclutados en escuelas públicas y privadas de Porto, y evaluadas periódicamente desde los 13 años y 3) Generación XXI, una de las mayores cohortes de nacimientos en Europa, compuesta por 8647 recién nacidos y sus familias acompañadas desde el nacimiento y reevaluadas cada tres años. Las cohortes representan un laboratorio de investigación poblacional con un biobanco, con cerca de 200.000 muestras. Este programa doctoral forma parte de las redes europeas de investigación y formación en Salud Pública y de la Asociación de Escuelas de Salud Pública de la Región Europea (ASPHER), que entre sus planes de futuro destaca el desarrollo de estructuras de fomento de intercambios entre los programas de doctorado y entre los estudiantes de doctorado en Salud Pública mediante reuniones profesionales o de investigación regulares, como el Foro de Jóvenes Investigadores en la conferencia anual de Salud Pública Europea. (12)

#### - FACULTAD DE MEDICINA. UNIVERSIDAD DE SÃO PAULO (BRASIL) (FMUSP)

La Facultad de Medicina, fue fundada en 1912-13 e incorporada a la Universidad de São Paulo en 1934. El Departamento de Medicina Preventiva de esta facultad, ofrece desde

1972 el **Programa de Posgrado en Medicina Preventiva (PPGMP)** (13), que proporciona los **títulos de Maestría y Doctorado en Ciencias**. El programa comprende tres áreas de conocimiento fundamentales de la Salud Pública: la Epidemiología, las Ciencias Sociales (Historia de la Ciencia) y Humanas, y la Planificación, Gestión y Evaluación en Salud. Este Programa de Posgrado es uno de los de mayor tradición en el área de Salud Pública de Brasil, pues ha jugado un papel decisivo en la formación de personal cualificado y en la constitución del campo de la Salud Pública en el país.

Destacan las actividades de internacionalización, puesto que el programa tiene tres acuerdos de doble titulación con universidades del exterior: con la Miguel Hernández de Elche, con la Universidad de Zaragoza, y con la Universidad de París. Además, hay coordinación entre disciplinas por parte de profesores internacionales; múltiples acuerdos de cooperación internacional para la investigación; y la adopción en 2016 de la recertificación de diez disciplinas que se imparten en inglés.

#### - FACULTAD DE SALUD PÚBLICA. UNIVERSIDAD DE SÃO PAULO (BRASIL)

Creada en 1918, la Facultad de Salud Pública es, hoy día, parte muy importante de la USP. Desde 2006 cuenta con una Comisión de Relaciones Internacionales, creada con el objetivo de incentivar su internacionalización, mediante la creación y formalización de convenios académicos y de investigación con instituciones de todo el mundo. (14). En cuanto a sus estudios, la FSP-USP cuenta con diversos programas de posgrado, entre los que se identifica el **Programa de Posgrado en Nutrición en Salud Pública (PPGNP)** (15), creado en 2007 a partir del **Programa de Posgrado en Salud Pública**, y uno de los más antiguos de Brasil que ofrece los títulos de Maestría y Doctorado. Este programa mantiene como objetivo formar a los estudiantes para el futuro desempeño en la docencia e investigación, tanto en campos básicos como experimentales y aplicados, y también para su inclusión como profesionales en actividades dentro de las políticas públicas sobre alimentos y nutrición. Destacan sus acciones de internacionalización para permitir y potenciar la movilidad de estudiantes e investigadores y la producción científica con universidades extranjeras, entre las que podemos citar University of London (Reino Unido); Curtin University, (Australia) y Harvard University (USD) (Global Burden of Disease Nutrition and Chronic Disease Expert Group - NutriCoDE). La Facultad también ofrece el programa de posgrado en Epidemiología (PPGEpi) (16), en el cual se enfatizan la innovación en métodos y técnicas en epidemiología y análisis de datos sobre la salud de la población.

- FACULTAD DE MEDICINA. UNIVERSIDAD MIGUEL HERNÁNDEZ DE ELCHE:

La facultad de Medicina de la Universidad de Alicante se creó en 1981 y se incorporó a la Universidad Miguel Hernández tras su creación en 1997. El departamento de Salud Pública e Historia de la Ciencia de la Facultad de Medicina ofrece dos programas de posgrado. Por un lado, el **Programa de Doctorado en Salud Pública, Ciencias Médicas y Quirúrgicas** (17), que pretende configurar un espacio académico multidisciplinar en torno al estudio de los principales problemas de salud en diferentes contextos. Las principales incluye las siguientes áreas: epidemiología, clínicas, tecnológicas, comportamentales, sociales, históricas y culturales de la Medicina y la Salud Pública. Este programa tiene firmado un convenio de doble titulación de doctorado internacional con la Facultad de Medicina de la Universidad de São Paulo (18). El departamento también ofrece, junto con las universidades de Alicante y Valencia, el **Programa de Doctorado Interuniversitario de Estudios Históricos y Sociales sobre la Ciencia, la Medicina y la Comunicación Científica**, que incluye la filosofía y la sociología de la ciencia, la historia de la medicina y de la ciencia, los lenguajes de especialidad, la documentación y la información científicas, y la comunicación y la divulgación de la ciencia. (19).

## ANEXO 2

### Programación del Seminario Internacional del CDT de Salud Pública e Historia de la Ciencia

19 de febrero de 2018: Salud Pública

Sala 2366 (Conexión UMH - USP - UP)

10:00: Apertura: Inauguración del Seminario por las Autoridades pertinentes

10:30 - 12:00: Epidemiología del Cáncer / Evaluación de pruebas diagnósticas.  
(*Participantes de UMH, USP, UP*)

12:00 - 14:00: Políticas Públicas (*sin conexión, presencial USP*)

14:00: Debate final

Sala 2372 (Conexión UMH - USP - UP)

10:30 - 12:00: Violencia de Género (*Participantes de UMH, USP, UP*)

12:00 - 14:00: Derechos Reproductivos y Reproducción Asistida (*Participantes de UMH, USP, UP*)

14:00: Debate final y clausura

Sala 2372 (Conexión USP y UP)

15:00 - 16:00: Epidemiología de las enfermedades Infecciosas (*Participantes de USP y UP*)

16:00 - 17:00: Salud Materno-Infantil (*Participantes de USP y UP*)

20 de febrero de 2018

Sala 2372 (Conexión USP-UMH)

11:00 - 13:00: Ginecología y Obstetricia (*Participantes de USP y UMH*)

13:00 a 14:00: Pausa/café

14:00 - 16:00: Enfermedades Infecciosas (*Participantes de USP y UMH*)

16:00: Debate final y clausura

Sala 2366: Historia de la Ciencia (Conexión UMH - USP - UP)

09:00 - 10:00: Eugenesia (*Participantes de UMH y USP*)

10:00 - 11:00: Reformas Sanitarias (*Participantes de UMH, USP y UP*)

11:00 - 12:00: Pausa/café

12:00 - 13:00: Prácticas Médicas y Sanitarias (*Participantes de UMH - USP y UP*)

13:00 - 14:00: Regulación, espacios de ciencia y cultura material (Participantes de UMH  
- USP y UP)

14:00 - 15:00: Documentación científica (*Participantes de UMH - USP y UP*)

15:00: Debate final y clausura
